# Supplementary material for: Photoluminescence of pure silicon quantum dots embedded in an amorphous silica wire array
Source: Royal Society of Chemistry journal article supplement (doi:10.1039/c7tc01117b), 2017-01-01
Supplement: c7tc01117b1.pdf [file c7tc01117b1.pdf]

## Supporting Materials

### Photoluminescence of pure silicon quantum dots embedded in amorphous silica wire array

Shunkai Lu, Bin Wu, Yuyang Sun, Yafei Cheng, Fan Liao, Mingwang Shao\*

Institute of Functional Nano & Soft Materials (FUNSOM), Jiangsu Key Laboratory  
for Carbon-Based Functional Materials & Devices, Soochow University, Suzhou,  
215123, Jiangsu, PR China

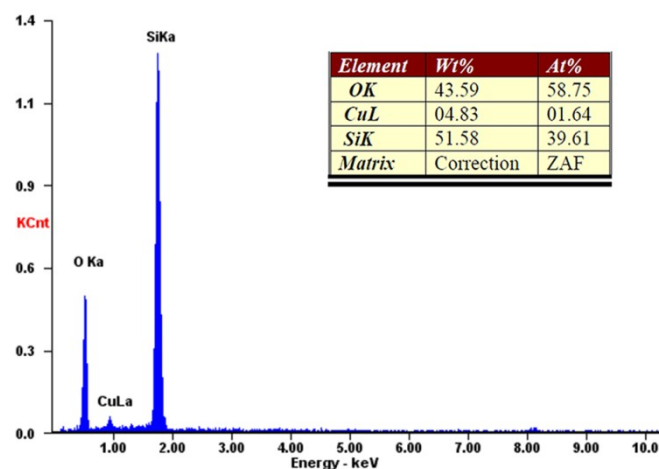

**Fig. S1** EDX analysis of the products. The products were dispersed on the copper sheet for analysis.

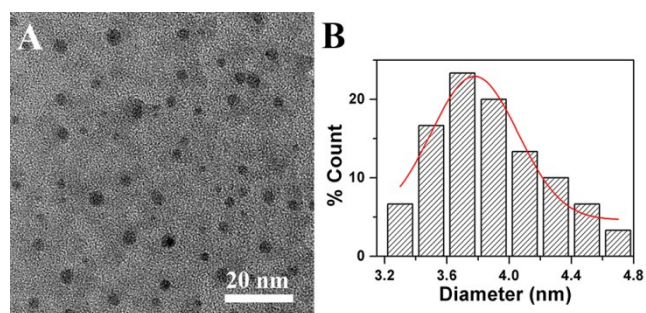

**Fig. S2** (A) TEM image and (B) size distribution of SiQDs treated by HF.

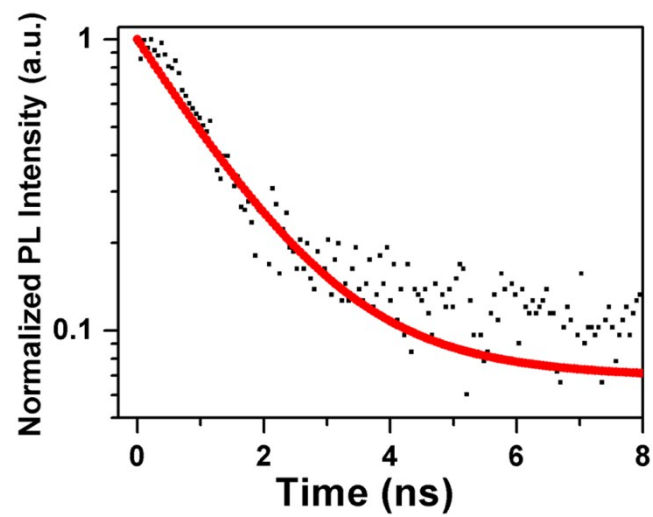

**Fig. S3** Time-resolved PL decays of SiQDs embedded in silica taken at 800 nm emission wavelength. The wavelength of excitation source is 635 nm.

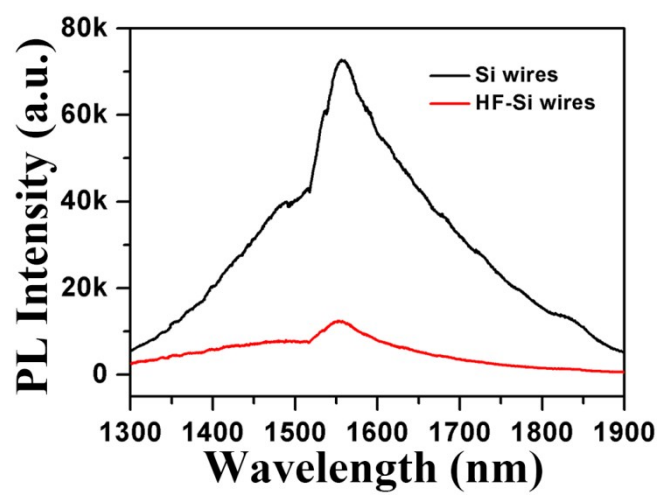

**Fig. S4** Infrared PL spectra of the products with (red line) and without (black line) hydrofluoric acid treatment.
